# Supplementary material for: Using Natural Deep Eutectic Systems as Alternative Media for Ocular Applications
Source: MDPI journal article supplement (doi:10.3390/pharmaceutics15051553), 2023-05-21
Supplement: s1 [file s1]

# Using Natural Deep Eutectic Systems as Alternative Media for Ocular Applications

Célia Sarmiento, Hugo Monteiro, Alexandre Paiva, Ana Rita C. Duarte and Ana Rita Jesus \*

LAQV-REQUIMTE, Chemistry Department, NOVA—School of Science and Technology, 2829-516 Caparica, Portugal; cc.sarmiento@campus.fct.unl.pt (C.S.); h.monteiro@campus.fct.unl.pt (H.M.); abp08838@fct.unl.pt (A.P.); ard08968@fct.unl.pt (A.R.C.D.)

\* Correspondence: ar.gameiro@fct.unl.pt; Tel.: +351-212-948-564

## Supporting Information

**S1 Viscosity as a function of shear rate**

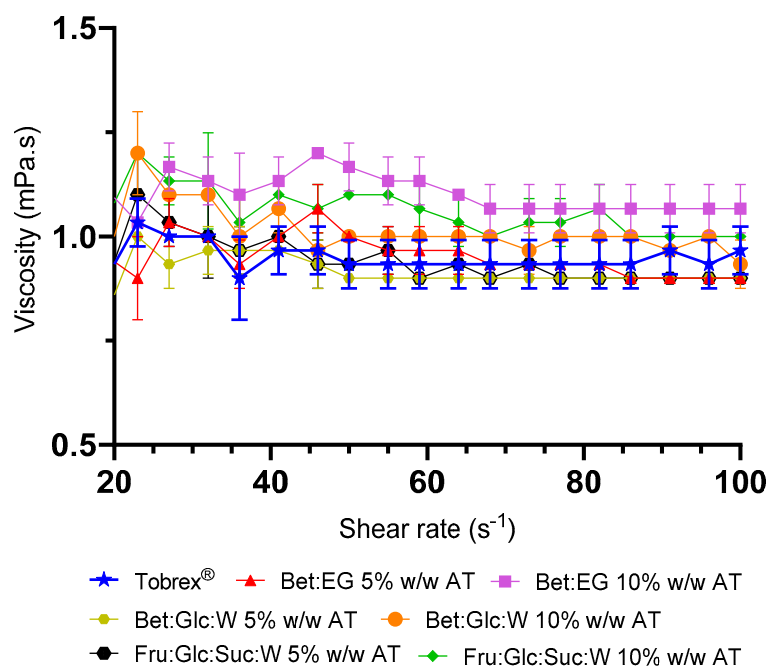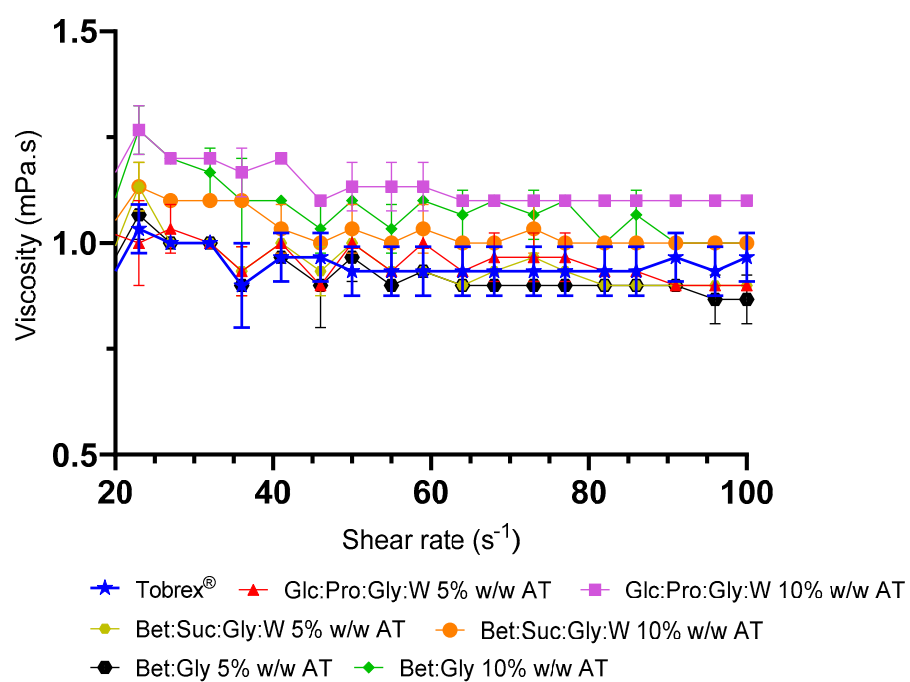

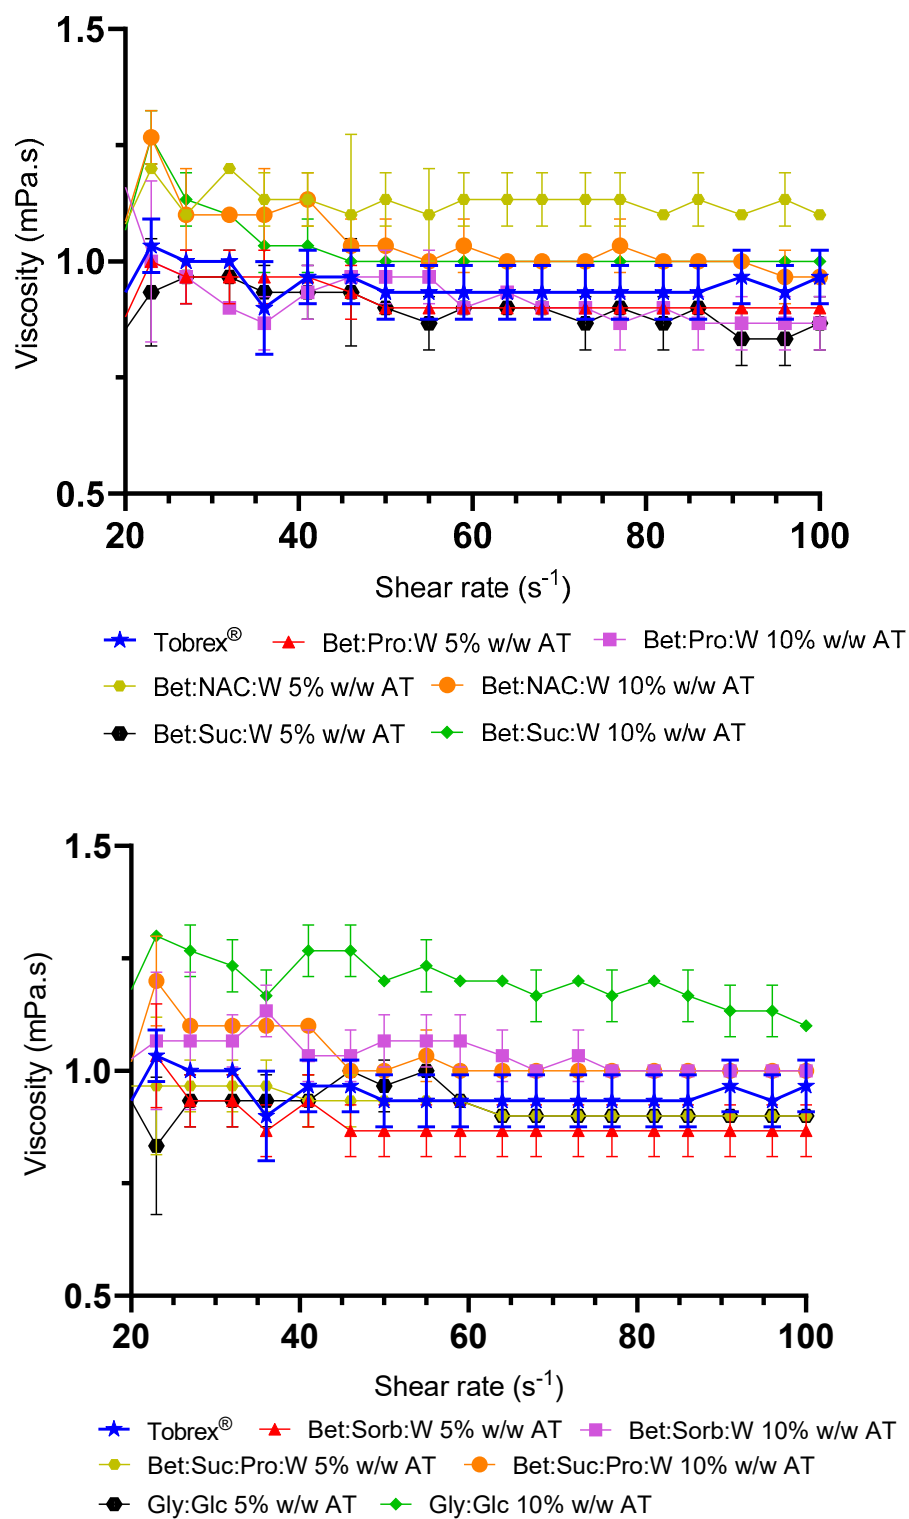

**Figure S1.** Viscosity as function of shear rate of NADES solutions and Tobrex®.

S2 Viscosity as a function of temperature

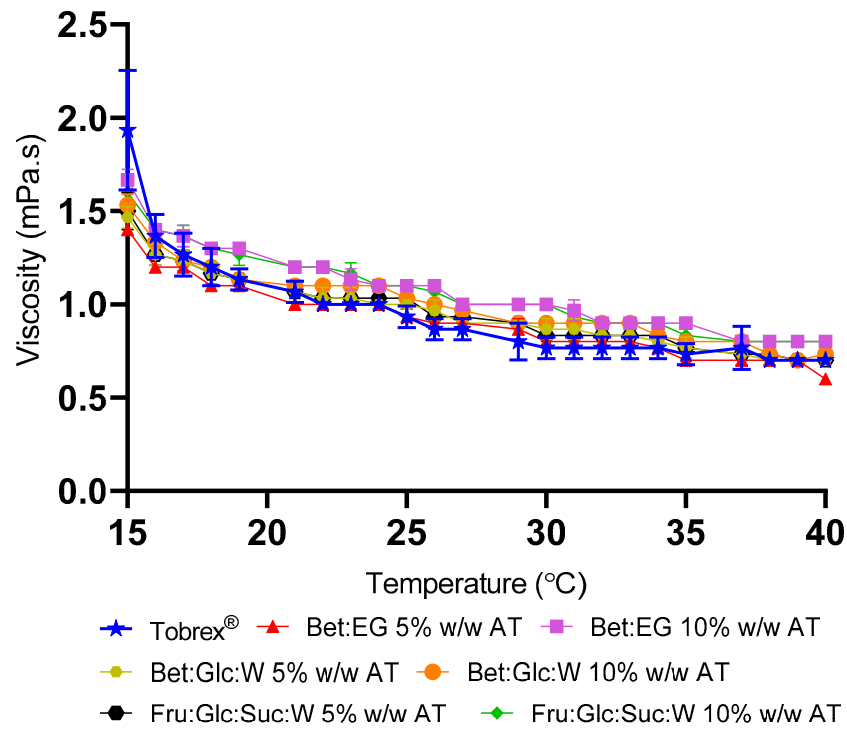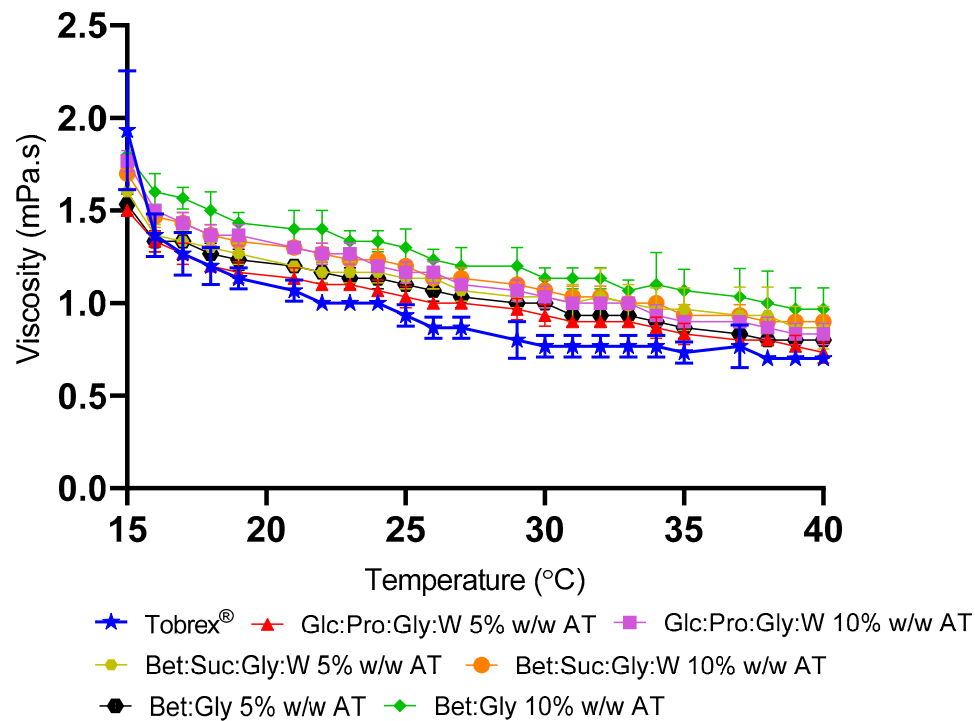

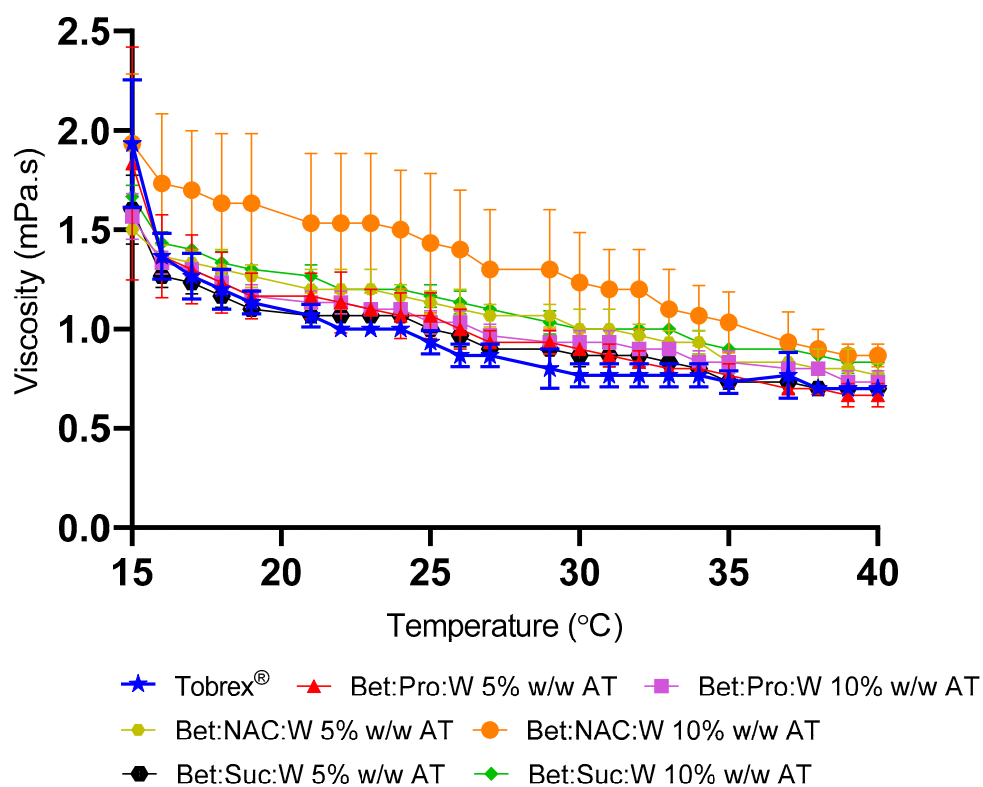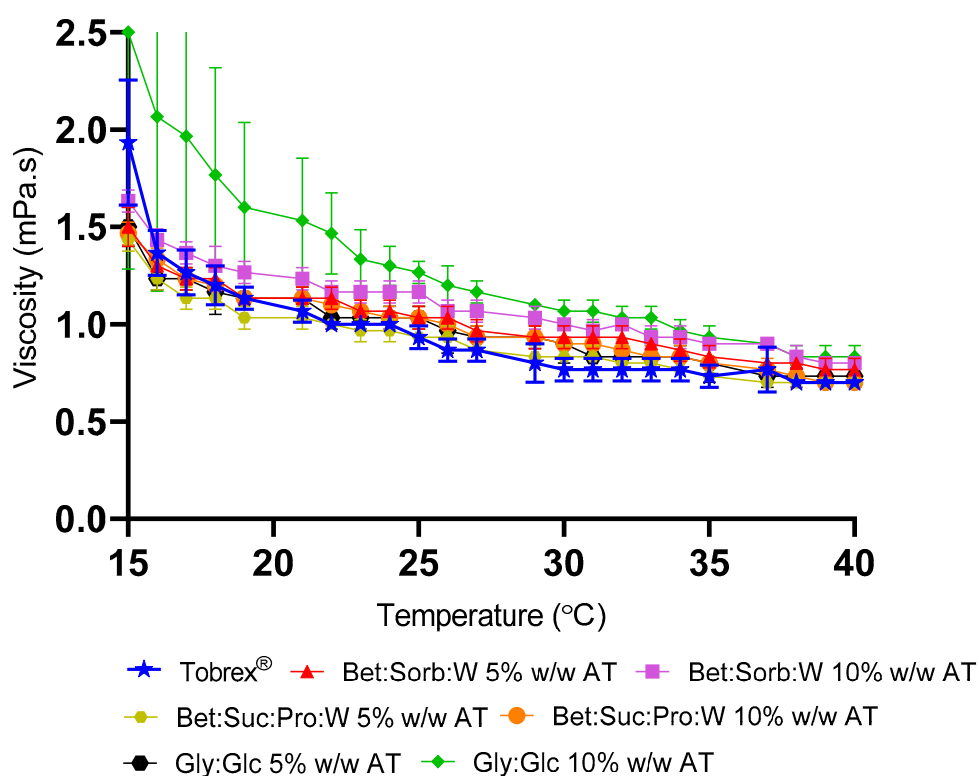

Figure S2. Viscosity *vs* temperature of NADES solutions and Tobrex®.

Table S1. Experimental viscosity data of Tobrex®, HPMC and NADES solutions(5% and 10%, w/v).

| Temperature (°C) | Tobrex®         |       | Bet:EG 5% w/w AT |       | Bet:EG 10% w/w AT |       | Bet:Glc:W 5% w/w AT |       | Bet:Glc:W 10% w/w AT |       |
|------------------|-----------------|-------|------------------|-------|-------------------|-------|---------------------|-------|----------------------|-------|
|                  | Viscosity (mPa) | SD    | Viscosity (mPa)  | SD    | Viscosity (mPa)   | SD    | Viscosity (mPa)     | SD    | Viscosity (mPa)      | SD    |
| 15.000           | 1.933           | 0.321 | 1.400            | 0.000 | 1.667             | 0.058 | 1.467               | 0.058 | 1.533                | 0.058 |
| 16.000           | 1.367           | 0.115 | 1.200            | 0.000 | 1.400             | 0.000 | 1.267               | 0.058 | 1.333                | 0.058 |
| 17.000           | 1.267           | 0.115 | 1.200            | 0.000 | 1.367             | 0.058 | 1.233               | 0.058 | 1.233                | 0.058 |
| 18.000           | 1.200           | 0.100 | 1.100            | 0.000 | 1.300             | 0.000 | 1.167               | 0.058 | 1.200                | 0.000 |
| 19.000           | 1.133           | 0.058 | 1.100            | 0.000 | 1.300             | 0.000 | 1.133               | 0.058 | 1.133                | 0.058 |
| 21.000           | 1.067           | 0.058 | 1.000            | 0.000 | 1.200             | 0.000 | 1.067               | 0.058 | 1.100                | 0.000 |
| 22.000           | 1.000           | 0.000 | 1.000            | 0.000 | 1.200             | 0.000 | 1.033               | 0.058 | 1.100                | 0.000 |
| 23.000           | 1.000           | 0.000 | 1.000            | 0.000 | 1.133             | 0.058 | 1.033               | 0.058 | 1.100                | 0.000 |
| 24.000           | 1.000           | 0.000 | 1.000            | 0.000 | 1.100             | 0.000 | 1.000               | 0.000 | 1.100                | 0.000 |
| 25.000           | 0.933           | 0.058 | 0.933            | 0.058 | 1.100             | 0.000 | 1.000               | 0.000 | 1.033                | 0.058 |
| 26.000           | 0.867           | 0.058 | 0.900            | 0.000 | 1.100             | 0.000 | 0.967               | 0.058 | 1.000                | 0.000 |
| 27.000           | 0.867           | 0.058 | 0.900            | 0.000 | 1.000             | 0.000 | 0.900               | 0.000 | 0.967                | 0.058 |
| 29.000           | 0.800           | 0.100 | 0.867            | 0.058 | 1.000             | 0.000 | 0.900               | 0.000 | 0.900                | 0.000 |
| 30.000           | 0.767           | 0.058 | 0.800            | 0.000 | 1.000             | 0.000 | 0.867               | 0.058 | 0.900                | 0.000 |
| 31.000           | 0.767           | 0.058 | 0.800            | 0.000 | 0.967             | 0.058 | 0.867               | 0.058 | 0.900                | 0.000 |
| 32.000           | 0.767           | 0.058 | 0.800            | 0.000 | 0.900             | 0.000 | 0.833               | 0.058 | 0.900                | 0.000 |
| 33.000           | 0.767           | 0.058 | 0.800            | 0.000 | 0.900             | 0.000 | 0.833               | 0.058 | 0.900                | 0.000 |
| 34.000           | 0.767           | 0.058 | 0.767            | 0.058 | 0.900             | 0.000 | 0.800               | 0.000 | 0.833                | 0.058 |
| 35.000           | 0.733           | 0.058 | 0.700            | 0.000 | 0.900             | 0.000 | 0.767               | 0.058 | 0.800                | 0.000 |
| 37.000           | 0.767           | 0.115 | 0.700            | 0.000 | 0.800             | 0.000 | 0.733               | 0.058 | 0.800                | 0.000 |
| 38.000           | 0.700           | 0.000 | 0.700            | 0.000 | 0.800             | 0.000 | 0.700               | 0.000 | 0.733                | 0.058 |
| 39.000           | 0.700           | 0.000 | 0.700            | 0.000 | 0.800             | 0.000 | 0.700               | 0.000 | 0.700                | 0.000 |
| 40.000           | 0.700           | 0.000 | 0.600            | 0.000 | 0.800             | 0.000 | 0.700               | 0.000 | 0.733                | 0.058 |

Table S1. Experimental viscosity data of Tobrex®, HPMC and NADES solutions(5% and 10%, w/v) (cont.)

| Temperature (°C) | Fru:Glc:Suc:W 5% w/w AT |       | Fru:Glc:Suc:W 10% w/w AT |       | Glc:Pro:Gly:W 5% w/w AT |       | Glc:Pro:Gly:W 10% w/w AT |       |
|------------------|-------------------------|-------|--------------------------|-------|-------------------------|-------|--------------------------|-------|
|                  | Viscosity (mPa)         | SD    | Viscosity (mPa)          | SD    | Viscosity (mPa)         | SD    | Viscosity (mPa)          | SD    |
| 15.000           | 1.500                   | 0.100 | 1.600                    | 0.100 | 1.500                   | 0.000 | 1.767                    | 0.058 |
| 16.000           | 1.267                   | 0.058 | 1.400                    | 0.000 | 1.333                   | 0.058 | 1.500                    | 0.000 |
| 17.000           | 1.233                   | 0.058 | 1.367                    | 0.058 | 1.267                   | 0.058 | 1.433                    | 0.058 |
| 18.000           | 1.167                   | 0.058 | 1.300                    | 0.000 | 1.200                   | 0.000 | 1.367                    | 0.058 |
| 19.000           | 1.133                   | 0.058 | 1.267                    | 0.058 | 1.167                   | 0.058 | 1.367                    | 0.058 |
| 21.000           | 1.067                   | 0.058 | 1.200                    | 0.000 | 1.133                   | 0.058 | 1.300                    | 0.000 |
| 22.000           | 1.033                   | 0.058 | 1.200                    | 0.000 | 1.100                   | 0.000 | 1.267                    | 0.058 |
| 23.000           | 1.033                   | 0.058 | 1.167                    | 0.058 | 1.100                   | 0.000 | 1.267                    | 0.058 |
| 24.000           | 1.033                   | 0.058 | 1.100                    | 0.000 | 1.067                   | 0.058 | 1.200                    | 0.000 |
| 25.000           | 1.033                   | 0.058 | 1.100                    | 0.000 | 1.033                   | 0.058 | 1.167                    | 0.058 |
| 26.000           | 0.933                   | 0.058 | 1.067                    | 0.058 | 1.000                   | 0.000 | 1.167                    | 0.058 |
| 27.000           | 0.933                   | 0.058 | 1.000                    | 0.000 | 1.000                   | 0.000 | 1.100                    | 0.000 |
| 29.000           | 0.900                   | 0.000 | 1.000                    | 0.000 | 0.967                   | 0.058 | 1.067                    | 0.058 |
| 30.000           | 0.833                   | 0.058 | 1.000                    | 0.000 | 0.933                   | 0.058 | 1.033                    | 0.058 |
| 31.000           | 0.833                   | 0.058 | 0.933                    | 0.058 | 0.900                   | 0.000 | 1.000                    | 0.000 |
| 32.000           | 0.833                   | 0.058 | 0.900                    | 0.000 | 0.900                   | 0.000 | 1.000                    | 0.000 |
| 33.000           | 0.833                   | 0.058 | 0.900                    | 0.000 | 0.900                   | 0.000 | 1.000                    | 0.000 |
| 34.000           | 0.833                   | 0.058 | 0.900                    | 0.000 | 0.867                   | 0.058 | 0.933                    | 0.058 |
| 35.000           | 0.767                   | 0.058 | 0.833                    | 0.058 | 0.833                   | 0.058 | 0.900                    | 0.000 |
| 37.000           | 0.733                   | 0.058 | 0.800                    | 0.000 | 0.800                   | 0.000 | 0.900                    | 0.000 |
| 38.000           | 0.733                   | 0.058 | 0.800                    | 0.000 | 0.800                   | 0.000 | 0.867                    | 0.058 |
| 39.000           | 0.700                   | 0.000 | 0.800                    | 0.000 | 0.767                   | 0.058 | 0.833                    | 0.058 |
| 40.000           | 0.700                   | 0.000 | 0.800                    | 0.000 | 0.733                   | 0.058 | 0.833                    | 0.058 |

Table S1. Experimental viscosity data of Tobrex®, HPMC and NADES solutions(5% and 10%, w/v) (cont.)

| Temperature (°C) | Bet:Suc:Gly:W 5% w/w AT |       | Bet:Suc:Gly:W 10% w/w AT |       | Bet:Gly 5% w/w AT |       | Bet:Gly 10% w/w AT |       |
|------------------|-------------------------|-------|--------------------------|-------|-------------------|-------|--------------------|-------|
|                  | Viscosity (mPa)         | SD    | Viscosity (mPa)          | SD    | Viscosity (mPa)   | SD    | Viscosity (mPa)    | SD    |
| 15.000           | 1.600                   | 0.000 | 1.700                    | 0.100 | 1.533             | 0.058 | 1.800              | 0.100 |
| 16.000           | 1.367                   | 0.058 | 1.467                    | 0.058 | 1.333             | 0.058 | 1.600              | 0.100 |
| 17.000           | 1.333                   | 0.058 | 1.433                    | 0.058 | 1.333             | 0.058 | 1.567              | 0.058 |
| 18.000           | 1.300                   | 0.000 | 1.367                    | 0.058 | 1.267             | 0.058 | 1.500              | 0.100 |
| 19.000           | 1.267                   | 0.058 | 1.333                    | 0.058 | 1.233             | 0.058 | 1.433              | 0.058 |
| 21.000           | 1.200                   | 0.000 | 1.300                    | 0.000 | 1.200             | 0.000 | 1.400              | 0.100 |
| 22.000           | 1.167                   | 0.058 | 1.267                    | 0.058 | 1.167             | 0.058 | 1.400              | 0.100 |
| 23.000           | 1.167                   | 0.058 | 1.233                    | 0.058 | 1.133             | 0.058 | 1.333              | 0.058 |
| 24.000           | 1.167                   | 0.058 | 1.233                    | 0.058 | 1.133             | 0.058 | 1.333              | 0.058 |
| 25.000           | 1.133                   | 0.058 | 1.200                    | 0.000 | 1.100             | 0.000 | 1.300              | 0.100 |
| 26.000           | 1.133                   | 0.058 | 1.133                    | 0.058 | 1.067             | 0.058 | 1.233              | 0.058 |
| 27.000           | 1.067                   | 0.058 | 1.133                    | 0.058 | 1.033             | 0.058 | 1.200              | 0.100 |
| 29.000           | 1.033                   | 0.058 | 1.100                    | 0.000 | 1.000             | 0.000 | 1.200              | 0.100 |
| 30.000           | 1.033                   | 0.058 | 1.067                    | 0.058 | 1.000             | 0.000 | 1.133              | 0.058 |
| 31.000           | 1.000                   | 0.100 | 1.033                    | 0.058 | 0.933             | 0.058 | 1.133              | 0.058 |
| 32.000           | 1.033                   | 0.153 | 1.033                    | 0.058 | 0.933             | 0.058 | 1.133              | 0.058 |
| 33.000           | 1.000                   | 0.100 | 1.000                    | 0.000 | 0.933             | 0.058 | 1.067              | 0.058 |
| 34.000           | 0.967                   | 0.115 | 1.000                    | 0.000 | 0.900             | 0.000 | 1.100              | 0.173 |
| 35.000           | 0.967                   | 0.115 | 0.933                    | 0.058 | 0.867             | 0.058 | 1.067              | 0.115 |
| 37.000           | 0.933                   | 0.153 | 0.933                    | 0.058 | 0.833             | 0.058 | 1.033              | 0.153 |
| 38.000           | 0.933                   | 0.153 | 0.900                    | 0.000 | 0.800             | 0.000 | 1.000              | 0.173 |
| 39.000           | 0.867                   | 0.115 | 0.900                    | 0.000 | 0.800             | 0.000 | 0.967              | 0.115 |
| 40.000           | 0.867                   | 0.115 | 0.900                    | 0.000 | 0.800             | 0.000 | 0.967              | 0.115 |

Table S1. Experimental viscosity data of Tobrex®, HPMC and NADES solutions(5% and 10%, w/v) (cont.)

| Temperature (°C) | Bet:Pro:W 5% w/w AT |       | Bet:Pro:W 10% w/w AT |       | Bet:NAC:W 5% w/w AT |       | Bet:NAC:W 10% w/w AT |       |
|------------------|---------------------|-------|----------------------|-------|---------------------|-------|----------------------|-------|
|                  | Viscosity (mPa)     | SD    | Viscosity (mPa)      | SD    | Viscosity (mPa)     | SD    | Viscosity (mPa)      | SD    |
| 15.000           | 1.833               | 0.586 | 1.567                | 0.115 | 1.500               | 0.000 | 1.933                | 0.351 |
| 16.000           | 1.367               | 0.208 | 1.333                | 0.058 | 1.367               | 0.058 | 1.733                | 0.351 |
| 17.000           | 1.300               | 0.173 | 1.300                | 0.000 | 1.333               | 0.058 | 1.700                | 0.300 |
| 18.000           | 1.233               | 0.153 | 1.233                | 0.058 | 1.300               | 0.100 | 1.633                | 0.351 |
| 19.000           | 1.167               | 0.115 | 1.167                | 0.058 | 1.267               | 0.058 | 1.633                | 0.351 |
| 21.000           | 1.167               | 0.115 | 1.133                | 0.058 | 1.200               | 0.100 | 1.533                | 0.351 |
| 22.000           | 1.133               | 0.153 | 1.133                | 0.058 | 1.200               | 0.100 | 1.533                | 0.351 |
| 23.000           | 1.100               | 0.100 | 1.100                | 0.000 | 1.200               | 0.100 | 1.533                | 0.351 |
| 24.000           | 1.067               | 0.115 | 1.100                | 0.000 | 1.167               | 0.058 | 1.500                | 0.300 |
| 25.000           | 1.067               | 0.115 | 1.033                | 0.058 | 1.133               | 0.058 | 1.433                | 0.351 |
| 26.000           | 1.000               | 0.100 | 1.033                | 0.058 | 1.100               | 0.100 | 1.400                | 0.300 |
| 27.000           | 0.933               | 0.058 | 0.967                | 0.058 | 1.067               | 0.058 | 1.300                | 0.300 |
| 29.000           | 0.933               | 0.058 | 0.933                | 0.058 | 1.067               | 0.058 | 1.300                | 0.300 |
| 30.000           | 0.900               | 0.000 | 0.933                | 0.058 | 1.000               | 0.100 | 1.233                | 0.252 |
| 31.000           | 0.867               | 0.058 | 0.933                | 0.058 | 1.000               | 0.100 | 1.200                | 0.200 |
| 32.000           | 0.833               | 0.058 | 0.900                | 0.000 | 0.967               | 0.058 | 1.200                | 0.200 |
| 33.000           | 0.800               | 0.000 | 0.900                | 0.000 | 0.933               | 0.058 | 1.100                | 0.200 |
| 34.000           | 0.800               | 0.000 | 0.833                | 0.058 | 0.933               | 0.058 | 1.067                | 0.153 |
| 35.000           | 0.767               | 0.058 | 0.833                | 0.058 | 0.833               | 0.058 | 1.033                | 0.153 |
| 37.000           | 0.700               | 0.000 | 0.800                | 0.000 | 0.833               | 0.058 | 0.933                | 0.153 |
| 38.000           | 0.700               | 0.000 | 0.800                | 0.000 | 0.800               | 0.100 | 0.900                | 0.100 |
| 39.000           | 0.667               | 0.058 | 0.733                | 0.058 | 0.800               | 0.100 | 0.867                | 0.058 |
| 40.000           | 0.667               | 0.058 | 0.733                | 0.058 | 0.767               | 0.058 | 0.867                | 0.058 |

Table S1. Experimental viscosity data of Tobrex®, HPMC and NADES solutions(5% and 10%, w/v) (cont.)

| Temperature (°C) | Bet:Suc:W 5% w/w AT |       | Bet:Suc:W 10% w/w AT |       | Bet:Sorb:W 5% w/w AT |       | Bet:Sorb:W 10% w/w AT |       |
|------------------|---------------------|-------|----------------------|-------|----------------------|-------|-----------------------|-------|
|                  | Viscosity (mPa)     | SD    | Viscosity (mPa)      | SD    | Viscosity (mPa)      | SD    | Viscosity (mPa)       | SD    |
| 15.000           | 1.600               | 0.173 | 1.667                | 0.058 | 1.500                | 0.100 | 1.633                 | 0.058 |
| 16.000           | 1.267               | 0.058 | 1.433                | 0.058 | 1.300                | 0.000 | 1.433                 | 0.058 |
| 17.000           | 1.233               | 0.058 | 1.400                | 0.000 | 1.233                | 0.058 | 1.367                 | 0.058 |
| 18.000           | 1.167               | 0.058 | 1.333                | 0.058 | 1.233                | 0.058 | 1.300                 | 0.100 |
| 19.000           | 1.100               | 0.000 | 1.300                | 0.000 | 1.133                | 0.058 | 1.267                 | 0.058 |
| 21.000           | 1.067               | 0.058 | 1.267                | 0.058 | 1.133                | 0.058 | 1.233                 | 0.058 |
| 22.000           | 1.067               | 0.058 | 1.200                | 0.000 | 1.133                | 0.058 | 1.167                 | 0.058 |
| 23.000           | 1.067               | 0.058 | 1.200                | 0.000 | 1.067                | 0.058 | 1.167                 | 0.058 |
| 24.000           | 1.067               | 0.058 | 1.200                | 0.000 | 1.067                | 0.058 | 1.167                 | 0.058 |
| 25.000           | 1.000               | 0.000 | 1.167                | 0.058 | 1.033                | 0.058 | 1.167                 | 0.058 |
| 26.000           | 0.967               | 0.058 | 1.133                | 0.058 | 1.033                | 0.058 | 1.067                 | 0.058 |
| 27.000           | 0.900               | 0.000 | 1.100                | 0.000 | 0.967                | 0.058 | 1.067                 | 0.058 |
| 29.000           | 0.900               | 0.000 | 1.033                | 0.058 | 0.933                | 0.058 | 1.033                 | 0.058 |
| 30.000           | 0.867               | 0.058 | 1.000                | 0.000 | 0.933                | 0.058 | 1.000                 | 0.000 |
| 31.000           | 0.867               | 0.058 | 1.000                | 0.000 | 0.933                | 0.058 | 0.967                 | 0.058 |
| 32.000           | 0.867               | 0.058 | 1.000                | 0.000 | 0.933                | 0.058 | 1.000                 | 0.000 |
| 33.000           | 0.833               | 0.058 | 1.000                | 0.000 | 0.900                | 0.000 | 0.933                 | 0.058 |
| 34.000           | 0.800               | 0.000 | 0.933                | 0.058 | 0.867                | 0.058 | 0.933                 | 0.058 |
| 35.000           | 0.733               | 0.058 | 0.900                | 0.000 | 0.833                | 0.058 | 0.900                 | 0.000 |
| 37.000           | 0.733               | 0.058 | 0.900                | 0.000 | 0.800                | 0.000 | 0.900                 | 0.000 |
| 38.000           | 0.700               | 0.000 | 0.867                | 0.058 | 0.800                | 0.000 | 0.833                 | 0.058 |
| 39.000           | 0.700               | 0.000 | 0.833                | 0.058 | 0.767                | 0.058 | 0.800                 | 0.000 |
| 40.000           | 0.700               | 0.000 | 0.833                | 0.058 | 0.767                | 0.058 | 0.800                 | 0.000 |

Table S1. Experimental viscosity data of Tobrex®, HPMC and NADES solutions(5% and 10%, w/v) (cont.)

| Temperature (°C) | Bet:Suc:Pro:W 5% w/w AT |       | Bet:Suc:Pro:W 10% w/w AT |       | Gly:Glc 5% w/w AT |       | Gly:Glc 10% w/w AT |       | Hypromellose 0,3% PBS |       |
|------------------|-------------------------|-------|--------------------------|-------|-------------------|-------|--------------------|-------|-----------------------|-------|
|                  | Viscosity (mPa)         | SD    | Viscosity (mPa)          | SD    | Viscosity (mPa)   | SD    | Viscosity (mPa)    | SD    | Viscosity (mPa)       | SD    |
| 15.000           | 1.433                   | 0.058 | 1.467                    | 0.058 | 1.500             | 0.100 | 2.500              | 1.217 | 2.900                 | 0.173 |
| 16.000           | 1.233                   | 0.058 | 1.333                    | 0.058 | 1.233             | 0.058 | 2.067              | 0.896 | 2.667                 | 0.115 |
| 17.000           | 1.133                   | 0.058 | 1.233                    | 0.058 | 1.233             | 0.058 | 1.967              | 0.723 | 2.567                 | 0.115 |
| 18.000           | 1.133                   | 0.058 | 1.200                    | 0.000 | 1.167             | 0.115 | 1.767              | 0.551 | 2.433                 | 0.153 |
| 19.000           | 1.033                   | 0.058 | 1.133                    | 0.058 | 1.133             | 0.058 | 1.600              | 0.436 | 2.333                 | 0.153 |
| 21.000           | 1.033                   | 0.058 | 1.133                    | 0.058 | 1.133             | 0.058 | 1.533              | 0.321 | 2.267                 | 0.115 |
| 22.000           | 1.000                   | 0.000 | 1.100                    | 0.000 | 1.033             | 0.058 | 1.467              | 0.208 | 2.167                 | 0.115 |
| 23.000           | 0.967                   | 0.058 | 1.067                    | 0.058 | 1.033             | 0.058 | 1.333              | 0.153 | 2.167                 | 0.115 |
| 24.000           | 0.967                   | 0.058 | 1.033                    | 0.058 | 1.033             | 0.058 | 1.300              | 0.100 | 2.067                 | 0.115 |
| 25.000           | 0.933                   | 0.058 | 1.033                    | 0.058 | 1.033             | 0.058 | 1.267              | 0.058 | 2.000                 | 0.100 |
| 26.000           | 0.933                   | 0.058 | 1.000                    | 0.000 | 0.967             | 0.115 | 1.200              | 0.100 | 1.933                 | 0.058 |
| 27.000           | 0.867                   | 0.058 | 0.933                    | 0.058 | 0.933             | 0.058 | 1.167              | 0.058 | 1.867                 | 0.115 |
| 29.000           | 0.833                   | 0.058 | 0.933                    | 0.058 | 0.933             | 0.058 | 1.100              | 0.000 | 1.800                 | 0.100 |
| 30.000           | 0.833                   | 0.058 | 0.900                    | 0.000 | 0.900             | 0.100 | 1.067              | 0.058 | 1.733                 | 0.058 |
| 31.000           | 0.833                   | 0.058 | 0.900                    | 0.000 | 0.833             | 0.058 | 1.067              | 0.058 | 1.667                 | 0.058 |
| 32.000           | 0.800                   | 0.000 | 0.867                    | 0.058 | 0.833             | 0.058 | 1.033              | 0.058 | 1.667                 | 0.058 |
| 33.000           | 0.800                   | 0.000 | 0.833                    | 0.058 | 0.833             | 0.058 | 1.033              | 0.058 | 1.633                 | 0.058 |
| 34.000           | 0.767                   | 0.058 | 0.833                    | 0.058 | 0.833             | 0.058 | 0.967              | 0.058 | 1.567                 | 0.115 |
| 35.000           | 0.733                   | 0.058 | 0.800                    | 0.000 | 0.800             | 0.100 | 0.933              | 0.058 | 1.533                 | 0.058 |
| 37.000           | 0.700                   | 0.000 | 0.767                    | 0.058 | 0.733             | 0.058 | 0.900              | 0.000 | 1.433                 | 0.058 |
| 38.000           | 0.700                   | 0.000 | 0.733                    | 0.058 | 0.733             | 0.058 | 0.833              | 0.058 | 1.433                 | 0.058 |
| 39.000           | 0.700                   | 0.000 | 0.700                    | 0.000 | 0.733             | 0.058 | 0.833              | 0.058 | 1.433                 | 0.058 |
| 40.000           | 0.700                   | 0.000 | 0.700                    | 0.000 | 0.733             | 0.058 | 0.833              | 0.058 | 1.433                 | 0.153 |

### S3. Solubility studies

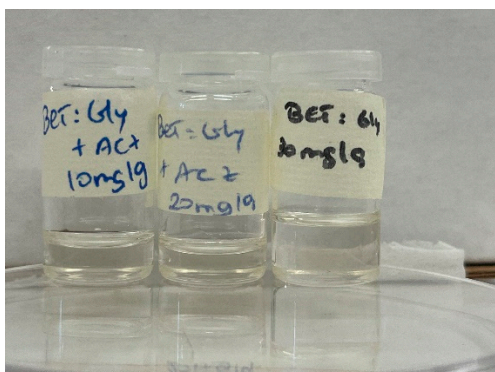

**Figure S3.** Example of ACZ dissolved in NADES.

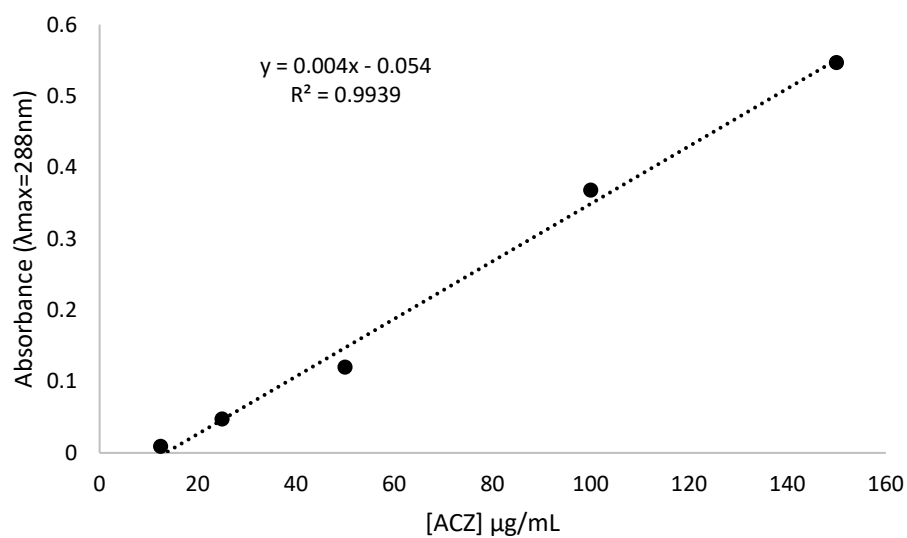

**Figure S4.** Calibration Curve of Acetaloamide.

**Table S2.** Quantification of ACZ in 5% aqueous solutions of NADES/ACZ mixtures.

| [ACZ] in NADES (mg/g) | [ACZ] <sub>teo</sub> in 5% aq NADES+ACZ (mg/mL) | [ACZ] <sub>exp</sub> in 5% aq. NADES+ACZ (mg/mL) |           |             |             |           |           |           |             |           |
|-----------------------|-------------------------------------------------|--------------------------------------------------|-----------|-------------|-------------|-----------|-----------|-----------|-------------|-----------|
|                       |                                                 | Bet:Eg                                           | Bet:Glc   | Glc:Pro:Gly | Bet:Gly:Suc | Bet:Gly   | Bet:NAC   | Bet:Suc   | Bet:Suc:Pro | Gly:Glc   |
| 10                    | 0.5                                             | 0.57±0.04                                        | 0.57±0.11 | 0.56±0.08   | 0.48±0.1    | 0.49±0.06 | 0.55±0.04 | 0.57±0.1  | 0.51±0.04   | 0.47±0.04 |
| 20                    | 1                                               | 1.10±0.1                                         | 1.16±0.02 | 1.14±0.05   | 1.05±0.12   | 1.01±0.04 | 1.12±0.07 | 1.00±0.13 | 0.94±0.12   | -         |
| 30                    | 1.5                                             | 1.51±0.01                                        | 1.58±0.04 | -           | -           | 1.41±0.07 | 1.53±0.06 | 1.31±0.17 | -           | -         |
